# Supplementary material for: Non-invasive technology to assess hydration status in advanced cancer to explore relationships between fluid status and symptoms: an observational study using bioelectrical impedance analysis
Source: bioRxiv or medRxiv preprint supplement (doi:10.1101/2023.08.25.23294216), 2023-09-06
Supplement: Supplementary file [file media-2.pdf]

**FACT-G7 (Version 4)**

Below is a list of statements that other people with your illness have said are important. **Please circle or mark one number per line to indicate your response as it applies to the past 7 days.**

|     |                                                          | Not<br>at all | A little<br>bit | Some-<br>what | Quite<br>a bit | Very<br>much |
|-----|----------------------------------------------------------|---------------|-----------------|---------------|----------------|--------------|
| GP1 | I have a lack of energy.....                             | 0             | 1               | 2             | 3              | 4            |
| GP4 | I have pain .....                                        | 0             | 1               | 2             | 3              | 4            |
| GP2 | I have nausea.....                                       | 0             | 1               | 2             | 3              | 4            |
| GE6 | I worry that my condition will get worse .....           | 0             | 1               | 2             | 3              | 4            |
| GF5 | I am sleeping well.....                                  | 0             | 1               | 2             | 3              | 4            |
| GF3 | I am able to enjoy life.....                             | 0             | 1               | 2             | 3              | 4            |
| GF7 | I am content with the quality of my life right now ..... | 0             | 1               | 2             | 3              | 4            |
