# Supplementary material for: Non-invasive technology to assess hydration status in advanced cancer to explore relationships between fluid status and symptoms: an observational study using bioelectrical impedance analysis
Source: bioRxiv or medRxiv preprint supplement (doi:10.1101/2023.08.25.23294216), 2023-09-06

**Edmonton Symptom Assessment System:  
(revised version) (ESAS-R)**

**Please circle the number that best describes how you feel NOW:**

|                                                             |   |   |   |   |   |   |   |   |   |   |    |                                    |
|-------------------------------------------------------------|---|---|---|---|---|---|---|---|---|---|----|------------------------------------|
| No Pain                                                     | 0 | 1 | 2 | 3 | 4 | 5 | 6 | 7 | 8 | 9 | 10 | Worst Possible Pain                |
| No Tiredness<br><i>(Tiredness = lack of energy)</i>         | 0 | 1 | 2 | 3 | 4 | 5 | 6 | 7 | 8 | 9 | 10 | Worst Possible Tiredness           |
| No Drowsiness<br><i>(Drowsiness = feeling sleepy)</i>       | 0 | 1 | 2 | 3 | 4 | 5 | 6 | 7 | 8 | 9 | 10 | Worst Possible Drowsiness          |
| No Nausea                                                   | 0 | 1 | 2 | 3 | 4 | 5 | 6 | 7 | 8 | 9 | 10 | Worst Possible Nausea              |
| No Lack of Appetite                                         | 0 | 1 | 2 | 3 | 4 | 5 | 6 | 7 | 8 | 9 | 10 | Worst Possible Lack of Appetite    |
| No Shortness of Breath                                      | 0 | 1 | 2 | 3 | 4 | 5 | 6 | 7 | 8 | 9 | 10 | Worst Possible Shortness of Breath |
| No Depression<br><i>(Depression = feeling sad)</i>          | 0 | 1 | 2 | 3 | 4 | 5 | 6 | 7 | 8 | 9 | 10 | Worst Possible Depression          |
| No Anxiety<br><i>(Anxiety = feeling nervous)</i>            | 0 | 1 | 2 | 3 | 4 | 5 | 6 | 7 | 8 | 9 | 10 | Worst Possible Anxiety             |
| Best Wellbeing<br><i>(Wellbeing = how you feel overall)</i> | 0 | 1 | 2 | 3 | 4 | 5 | 6 | 7 | 8 | 9 | 10 | Worst Possible Wellbeing           |
| No _____<br>Other Problem <i>(for example constipation)</i> | 0 | 1 | 2 | 3 | 4 | 5 | 6 | 7 | 8 | 9 | 10 | Worst Possible _____               |

Patient's Name \_\_\_\_\_

Date \_\_\_\_\_ Time \_\_\_\_\_

Completed by (check one):

- Patient
- Family caregiver
- Health care professional caregiver
- Caregiver-assisted

**BODY DIAGRAM ON REVERSE SIDE**

Please mark on these pictures where it is that you hurt:

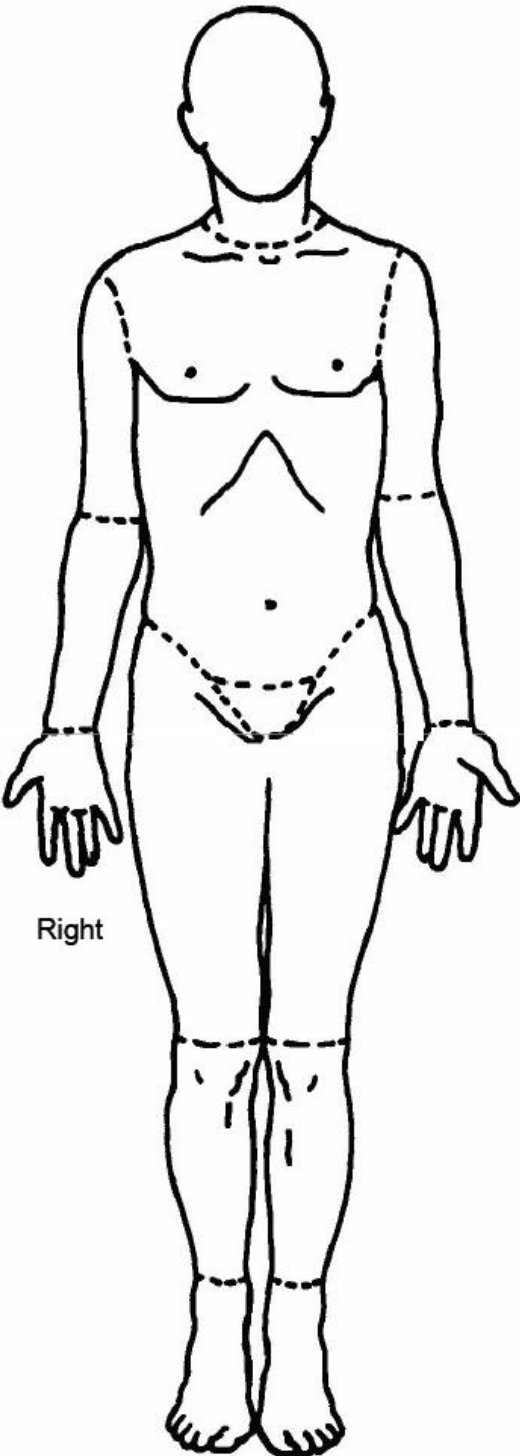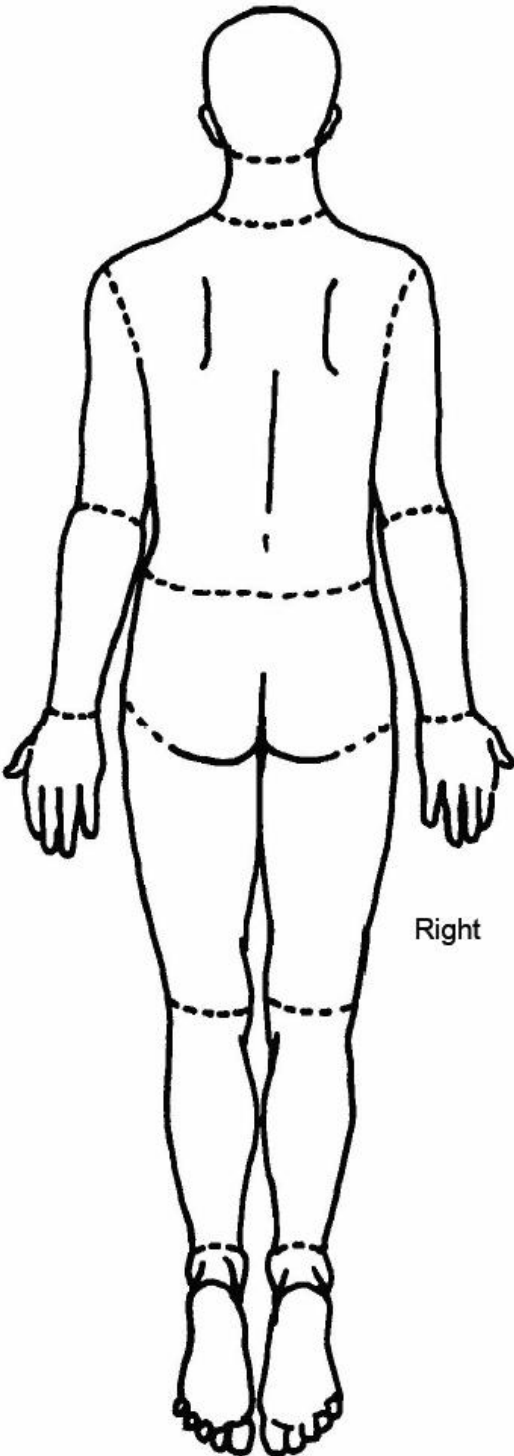

Supplement: Supplementary file [file media-4.pdf]
